# Supplementary material
Source: PubMed Central journal article supplement (PMC4110453)

**Supplementary Material** for  
Detection Call Algorithms for High-throughput Gene Expression Microarray Data  
K.J. Archer and S.E. Reese

**Table 1.** List of probe sets belonging to each spike-in concentration group.

| Probe set   | Spike Group |
|-------------|-------------|
| 204205_at   | J           |
| 204265_s_at | J           |
| 204951_at   | J           |
| 205790_at   | J           |
| 205903_s_at | J           |
| 207641_at   | J           |
| 207655_s_at | J           |
| 203508_at   | K           |
| 204912_at   | K           |
| 204959_at   | K           |
| 205692_s_at | K           |
| 206060_s_at | K           |
| 209795_at   | K           |
| 210895_s_at | K           |
| 203471_s_at | L           |
| 204836_at   | L           |
| 205267_at   | L           |
| 207540_s_at | L           |
| 209734_at   | L           |

**Supplementary Material** for  
Detection Call Algorithms for High-throughput Gene Expression Microarray Data  
K.J. Archer and S.E. Reese

|             |   |
|-------------|---|
| 212827_at   | L |
| 200665_s_at | M |
| 201721_s_at | M |
| 204563_at   | M |
| 205249_at   | M |
| 205671_s_at | M |
| 212886_at   | M |

**Supplementary Material** for  
Detection Call Algorithms for High-throughput Gene Expression Microarray Data  
K.J. Archer and S.E. Reese

**Caption for Figures 1-4:** Boxplots of detection call p-values by spike-in concentration for Affymetrix low level spike-in dataset for each set of replicate chips.

**Figure 1.**

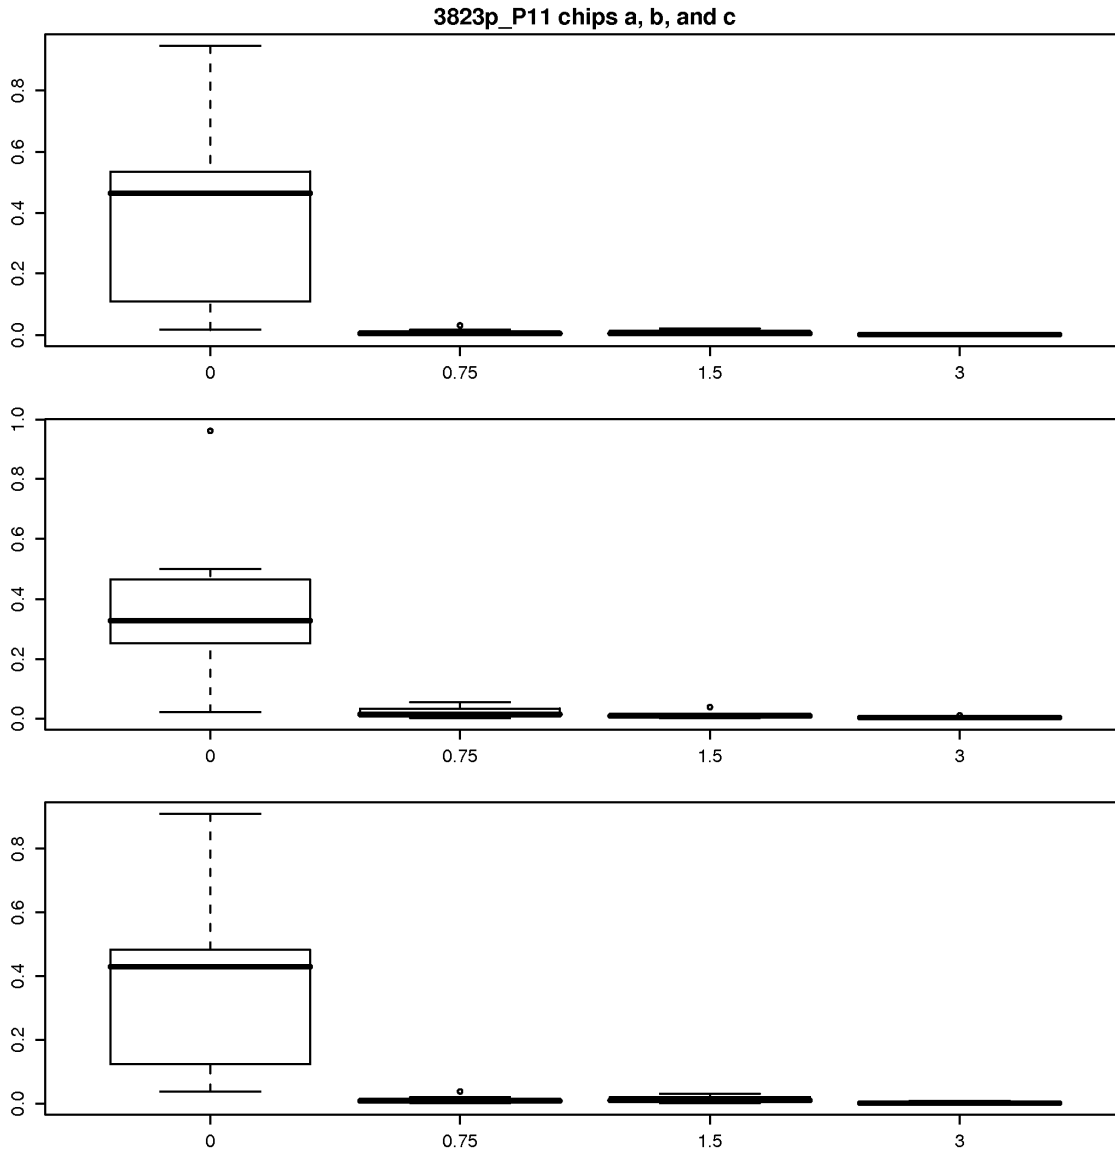

**Supplementary Material for**  
Detection Call Algorithms for High-throughput Gene Expression Microarray Data  
K.J. Archer and S.E. Reese

**Figure 2.**

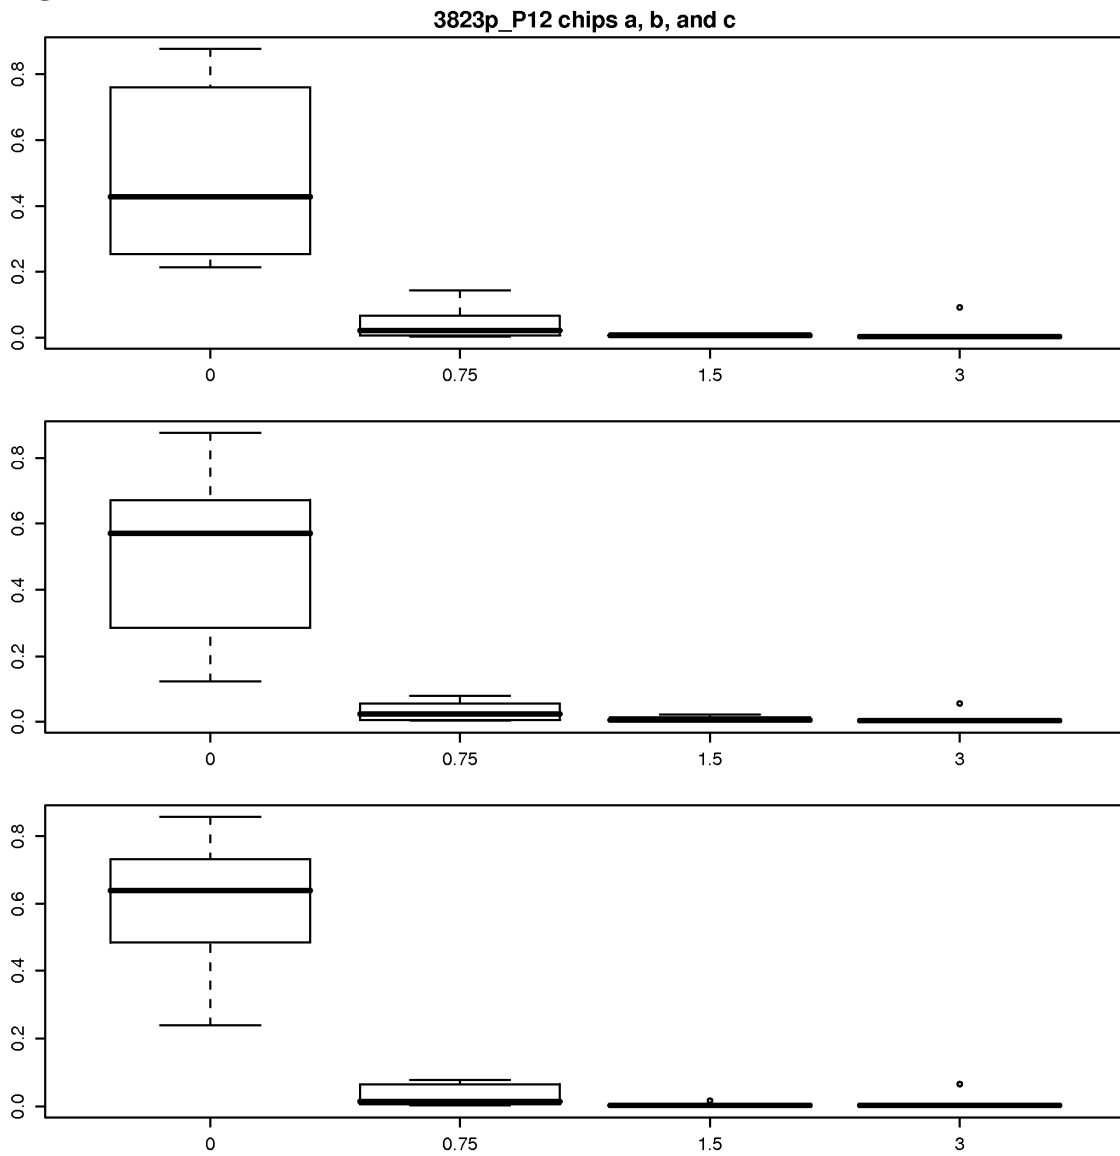

**Supplementary Material for**  
Detection Call Algorithms for High-throughput Gene Expression Microarray Data  
K.J. Archer and S.E. Reese

**Figure 3.**

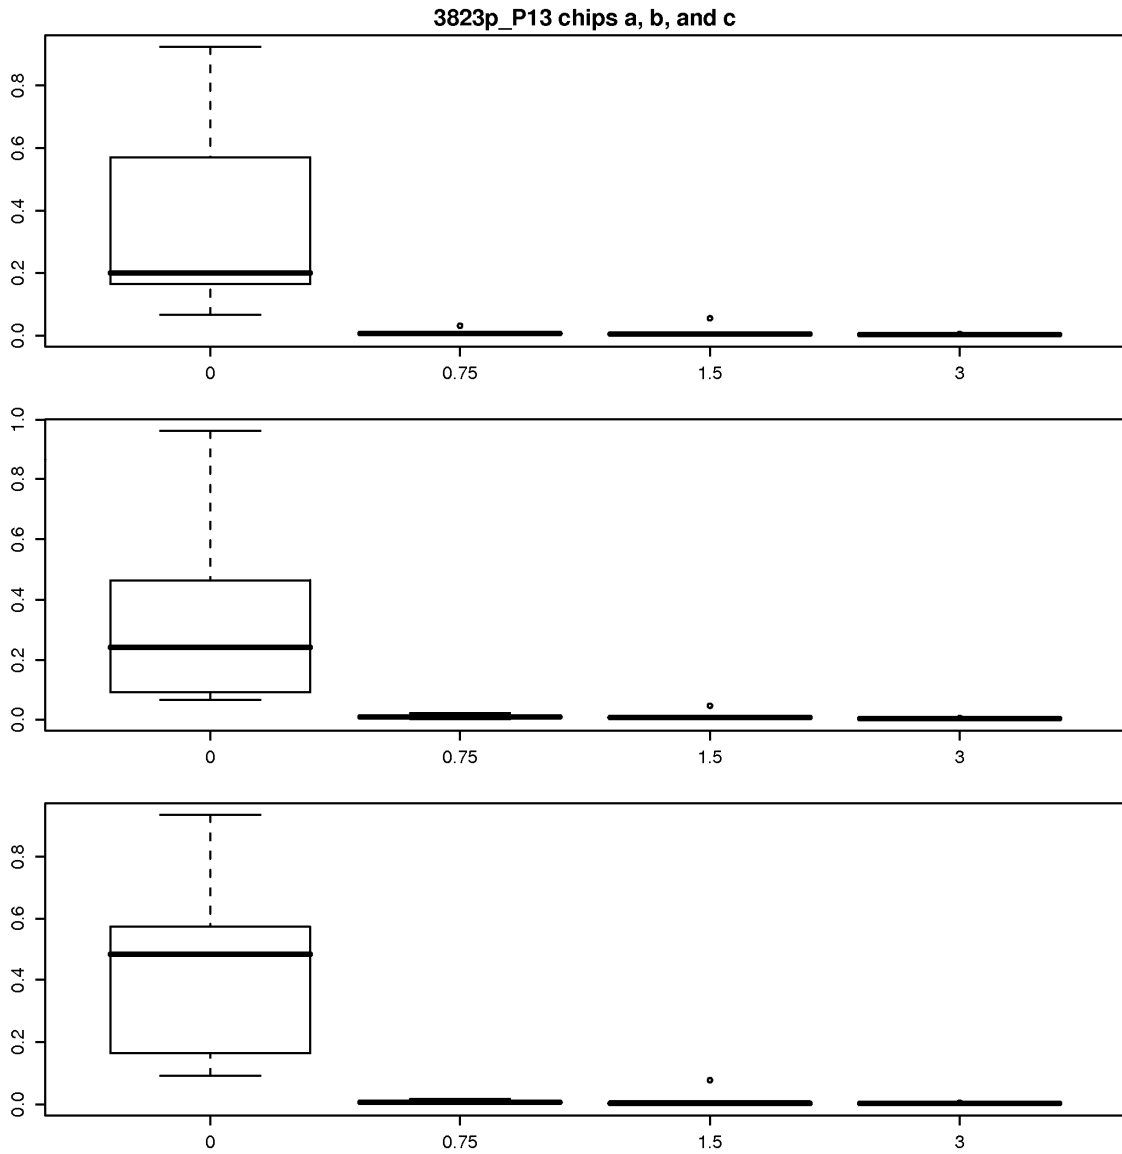

**Supplementary Material for**  
Detection Call Algorithms for High-throughput Gene Expression Microarray Data  
K.J. Archer and S.E. Reese

**Figure 4.**

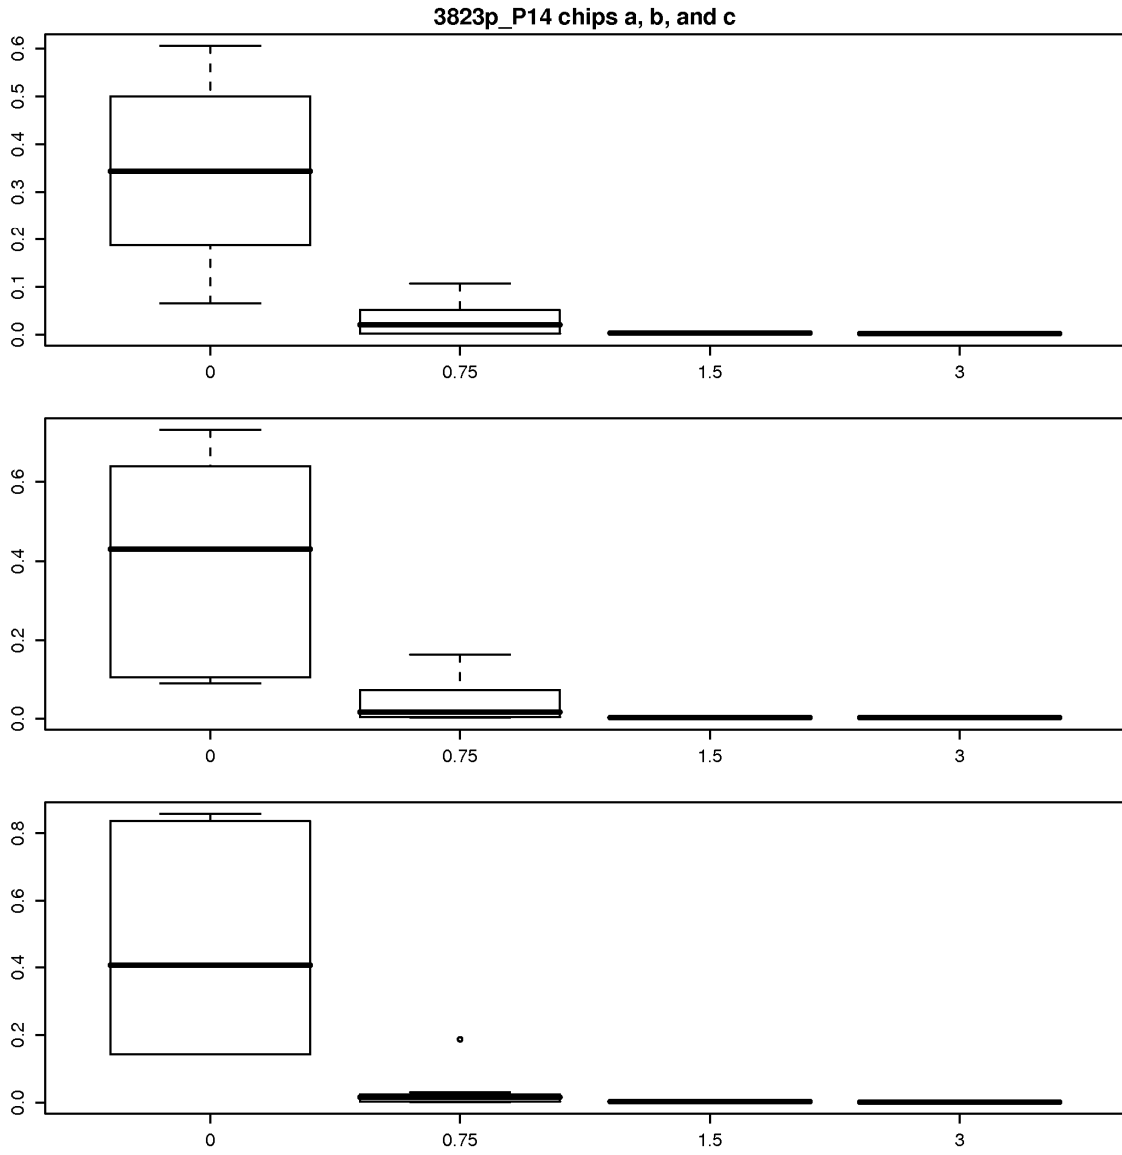

**Caption for Figures 5-10:** Boxplots of p-values from two-sample t-test comparing mean bead-level expression to the mean of the negative control bead-level expression by replicate hybridizations for the Illumina spike-in dataset.

**Figure 5.**

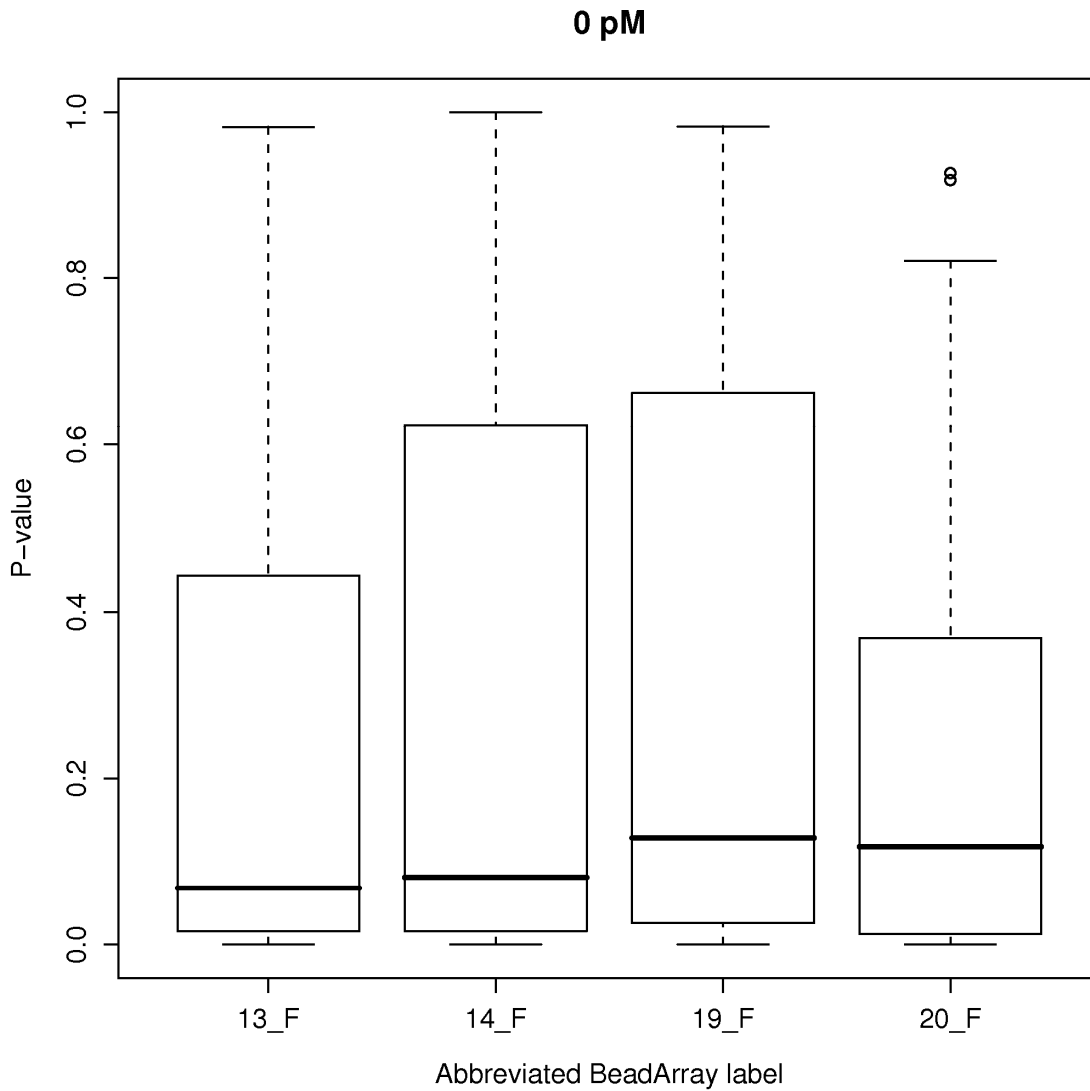

Figure 6.

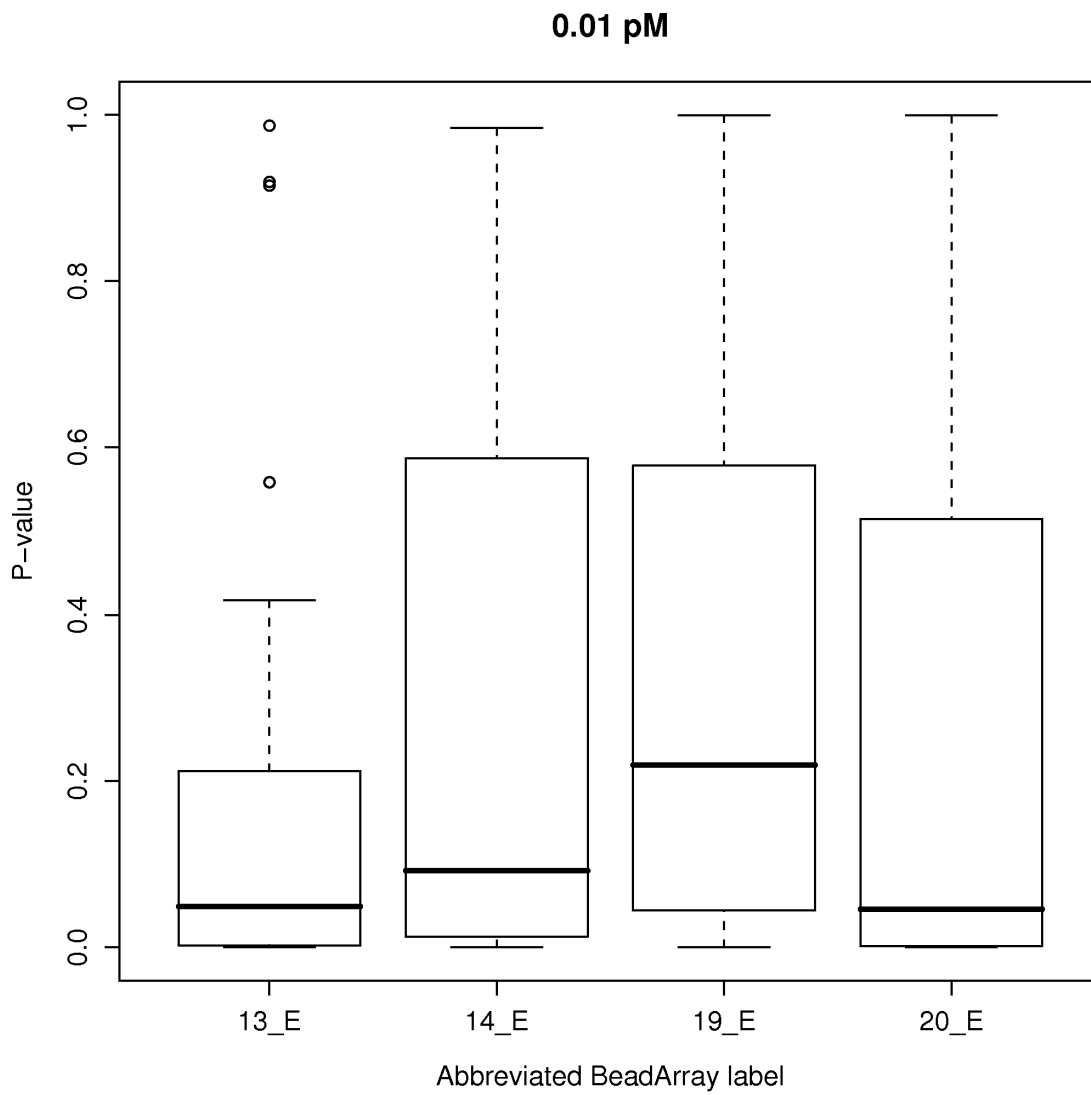



Figure 7.

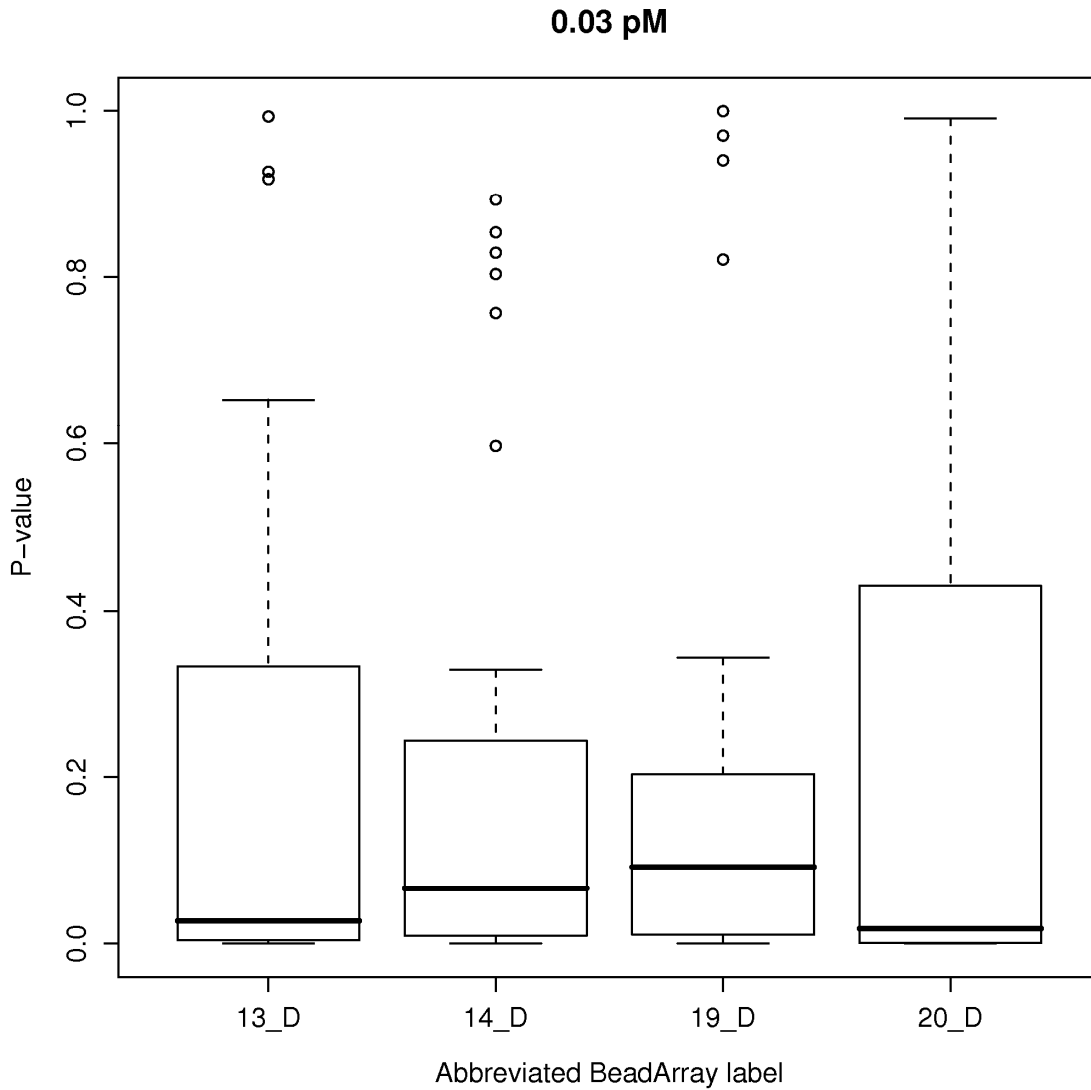

Figure 8.

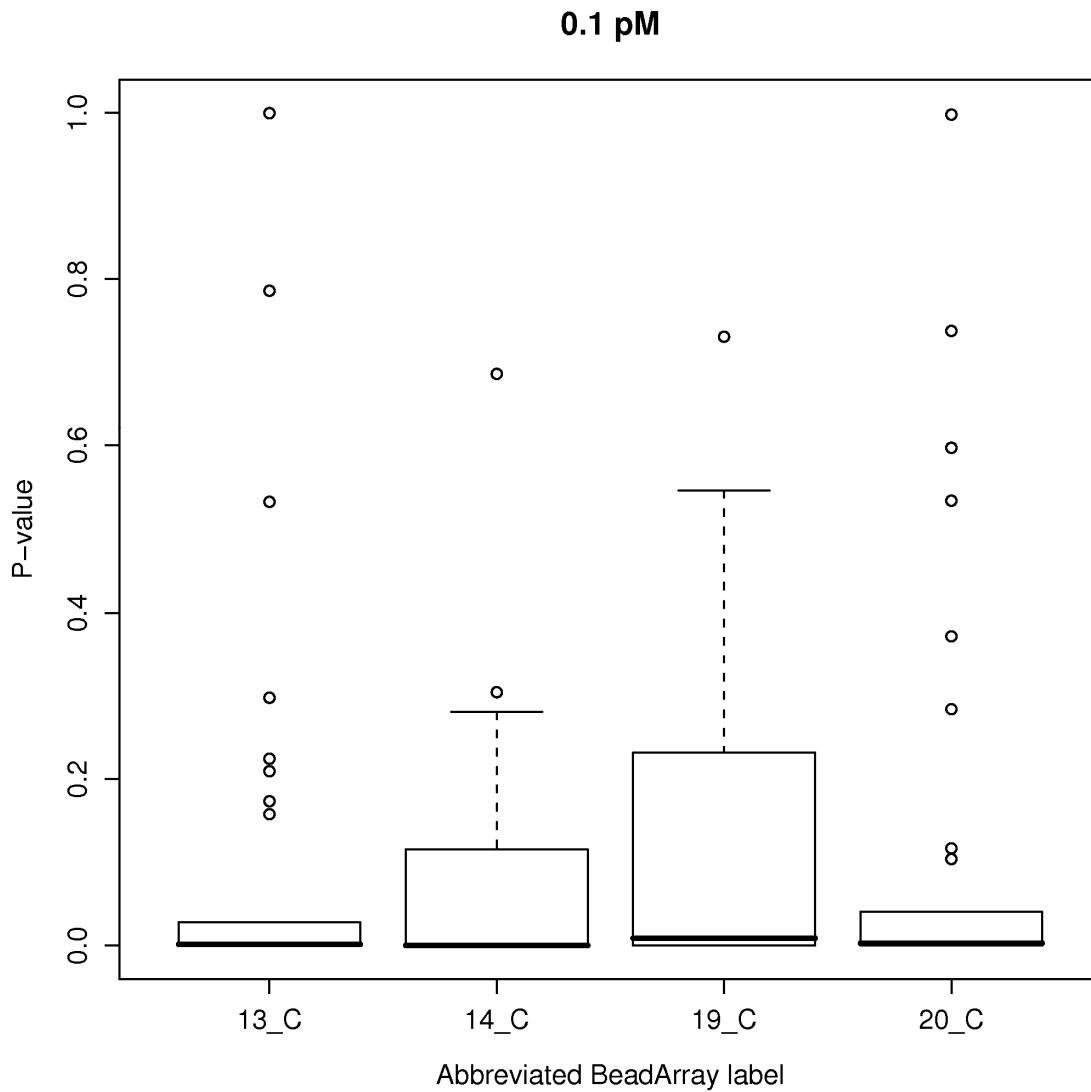

Figure 9.

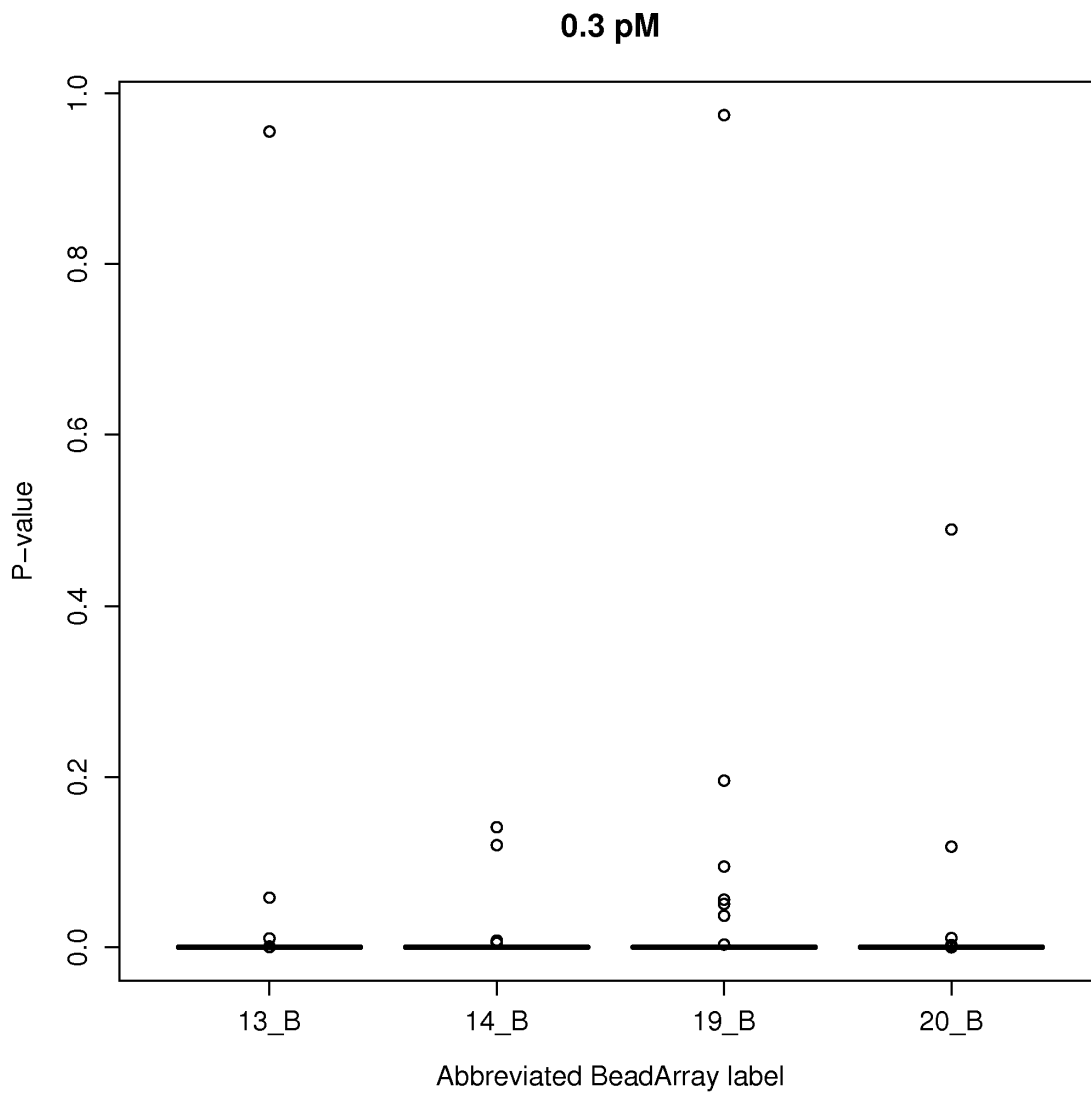

Figure 10.

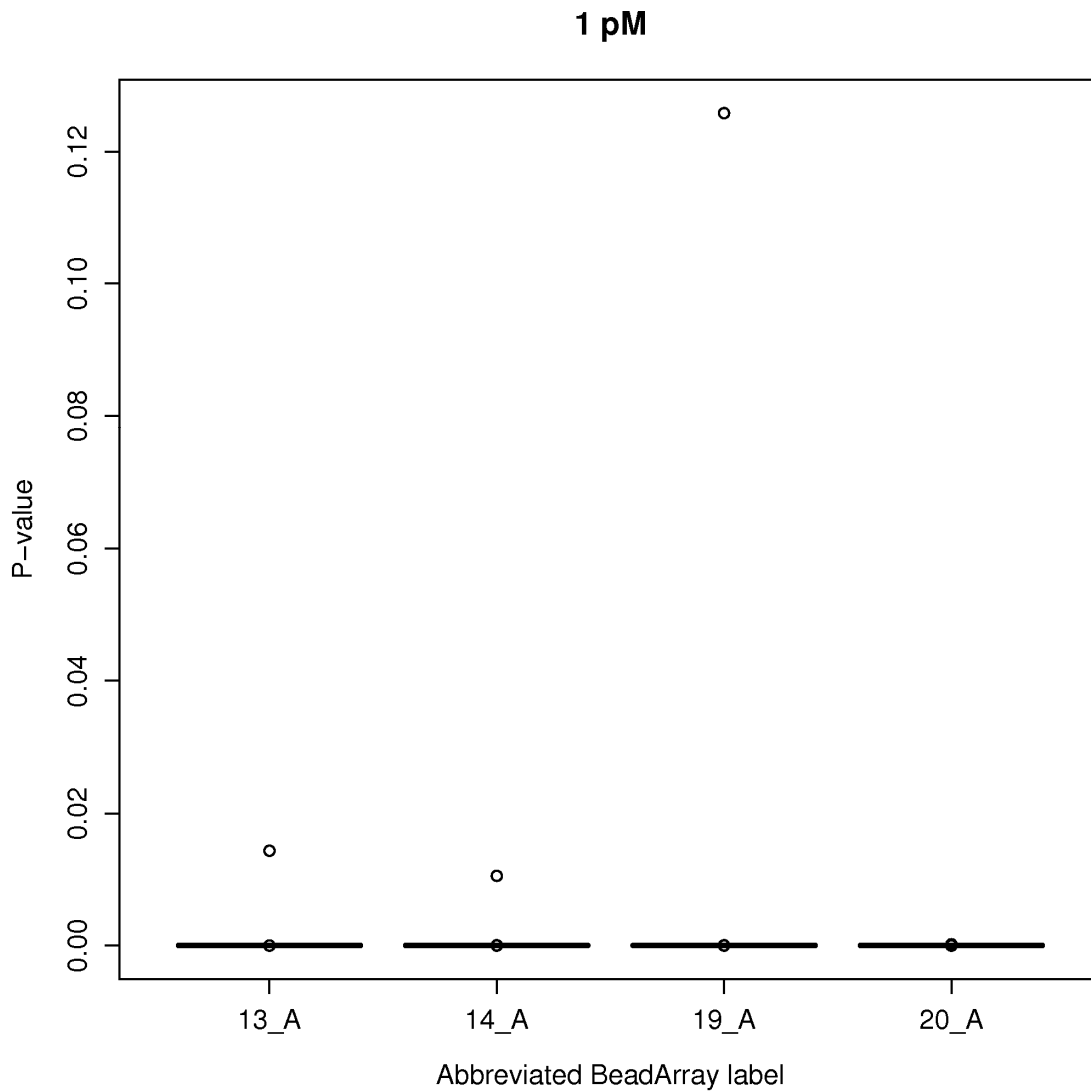

Supplement: supp_bbp055_Supplementary_Material.pdf [file supp_bbp055_Supplementary_Material.pdf]
